# Supplementary material for: On the cross-tropopause transport of water by tropical convective overshoots: a mesoscale modelling study constrained by in situ observations during the TRO-Pico field campaign in Brazil
Source: Copernicus journal article supplement (doi:10.5194/acp-22-881-2022), 2022-01-19
Supplement: Supplementary file 2 [file acp-22-881-2022-supplement.zip]

Archive with 4 entries (4 files):
- movie_brams_cross-section_13March2012.mp4
- Behera_ACP_2022_SI.pdf
- movie_radar_brams_13March2012.mp4
- acp-22-881-2022-supplement-title-page.pdf
