# Supplementary material for: On the cross-tropopause transport of water by tropical convective overshoots: a mesoscale modelling study constrained by in situ observations during the TRO-Pico field campaign in Brazil
Source: Copernicus journal article supplement (doi:10.5194/acp-22-881-2022), 2022-01-19
Supplement: Supplementary file 2 [file acp-22-881-2022-supplement.zip › acp-22-881-2022-supplement-title-page.pdf]

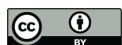

## *Supplement of*

# **On the cross-tropopause transport of water by tropical convective overshoots: a mesoscale modelling study constrained by in situ observations during the TRO-Pico field campaign in Brazil**

**Abhinna K. Behera et al.**

*Correspondence to:* Abhinna K. Behera ([abhinna.behera@univ-lille.fr](mailto:abhinna.behera@univ-lille.fr))

- [acp-22-881-2022-supplement-title-page.pdf](#)
- [Behera\\_ACP\\_2022\\_SI.pdf](#)
- [movie\\_brams\\_cross-section\\_13March2012.mp4](#)
- [movie\\_radar\\_brams\\_13March2012.mp4](#)

The copyright of individual parts of the supplement might differ from the article licence.
